# Supplementary material
Source: PubMed Central journal article supplement (PMC11639262)
Supplement: NIHPP2024.08.21.608680v4-supplement-1.pdf [file NIHPP2024.08.21.608680v4-supplement-1.pdf]

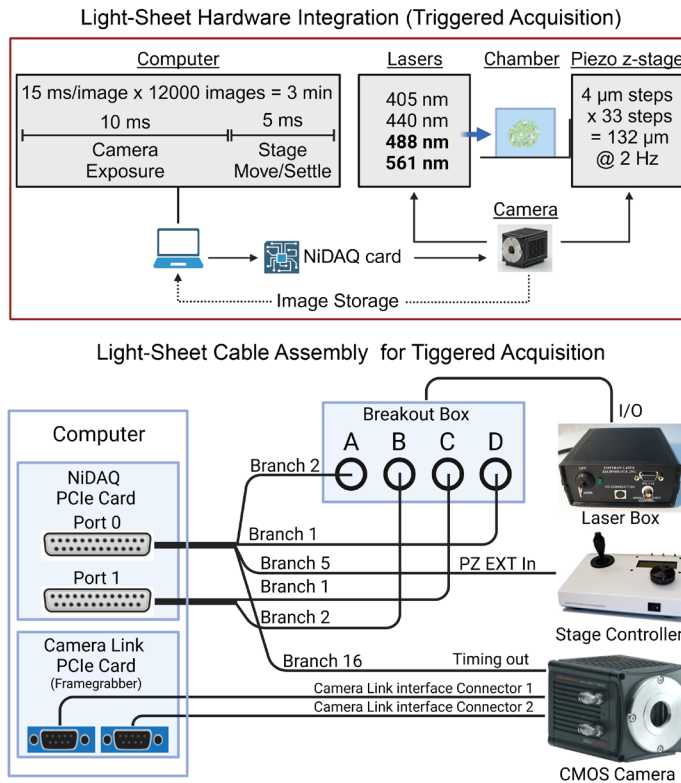

639

640 **Suppl. Fig. 1. Hardware wiring diagram of the light-sheet microscope.** Hardware integration (top  
641 panel) for camera-triggered activation of the excitation lasers and piezo z-stage that limits  
642 communication to a single instruction from the computer every 3 minutes. Wiring diagram (bottom  
643 panel): two Nikon ‘standard cables’ connect to the NiDAQ card installed in the computer. These two  
644 cables link to the laser control box, stage controller and camera. The images captured are received by  
645 the computer through a camera link PCIe card. and

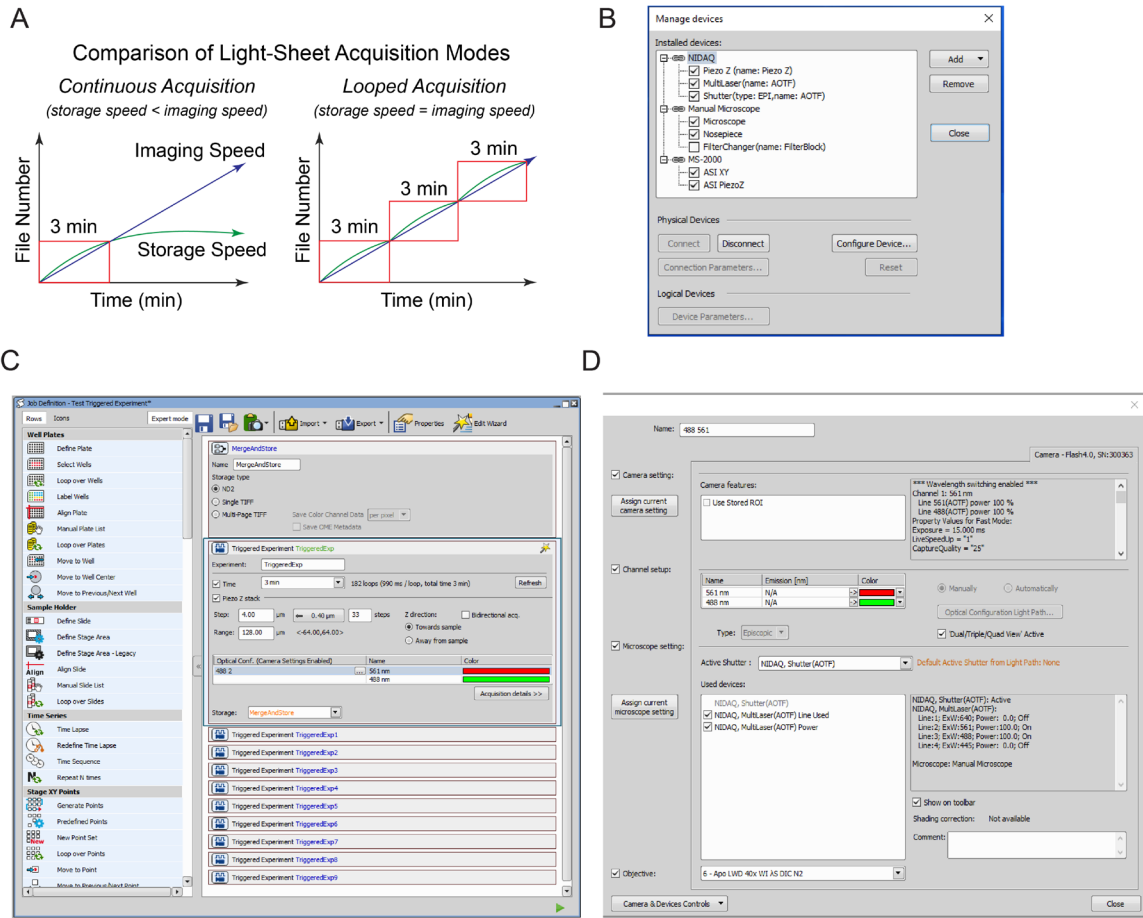

646

647 **Suppl. Fig. 2. NIS-Elements software configuration.** (A) Schematic for comparing continuous  
648 acquisition and looped acquisition. The red box indicates the 3-minute window where storage speed is  
649 higher than imaging speed. (B) Devices linked to NIS-Elements. (C) NIS-Elements JOBS module  
650 configured for looped acquisition. (D) Optical configuration for simultaneous GCaMP6s/H2B-mCherry  
651 excitation.

652

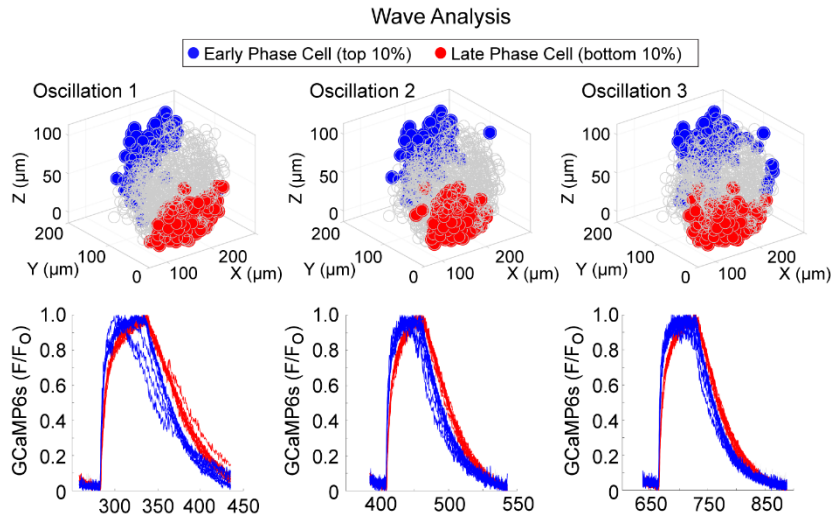

653

654 **Suppl. Fig. 3. Location of early and late phase cells in an islet with stable wave axis.** 3D  
655 representation of the islet showing the location of early phase cells (blue) and late phase cells (red) over  
656 three consecutive oscillations (top panel) and their corresponding Ca<sup>2+</sup> traces (bottom panel).

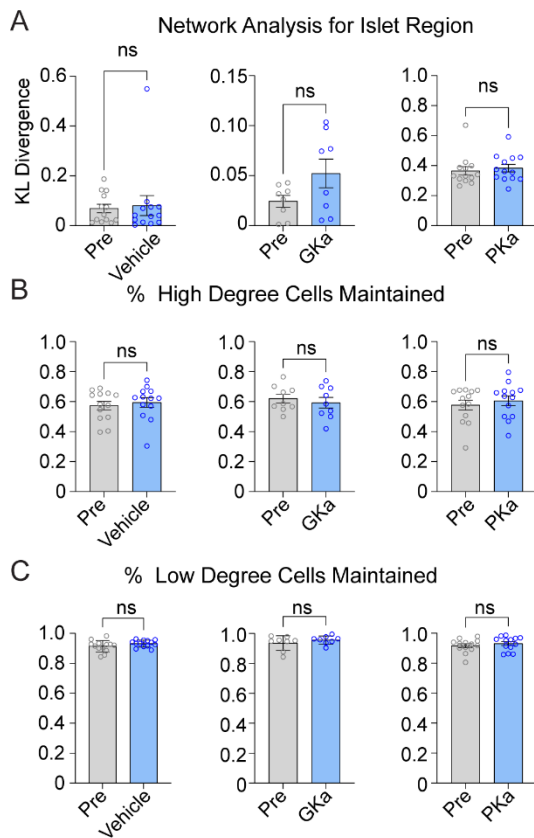

657

658 **Suppl. Fig. 4. Effect of glycolytic activators on the  $\beta$ -cell network.** (A-C) Effect of vehicle,  
659 glucokinase activator (GK $\alpha$ ), and pyruvate kinase activator (PK $\alpha$ ) on regional consistency of the  $\beta$ -cell  
660 network (A), high degree cell retention (B), and low degree cells retention (C). Data are displayed as  
661 mean  $\pm$  SEM.

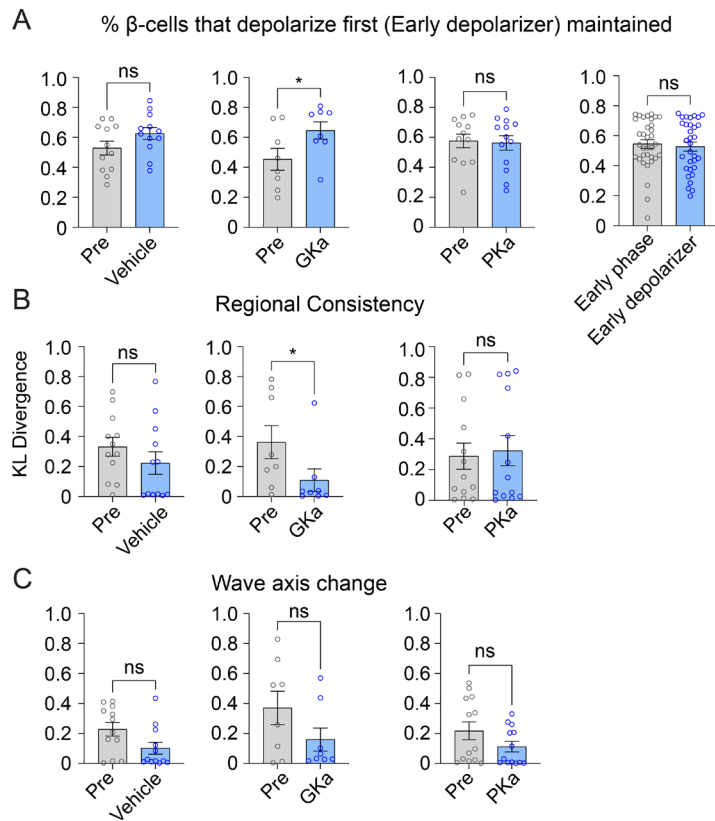

662

663 **Suppl. Fig. 5. Effect of glycolytic activators on the  $\beta$ -cells that depolarize first.** (A-C) Effect of  
664 vehicle, glucokinase activator (GKa), and pyruvate kinase activator (PKa) on the retention (A), regional  
665 consistency (B), and wave axis change (C) of the  $\beta$ -cells that depolarize first (Early depolarizer). The  
666 retention of  $\beta$ -cells that depolarize first (Early depolarizer) is similar to cells that depolarize and  
667 repolarize first (Early phase). Data are displayed as mean  $\pm$  SEM.
